# Supplementary material
Source: PubMed Central journal article supplement (PMC3604723)

Figure 1A

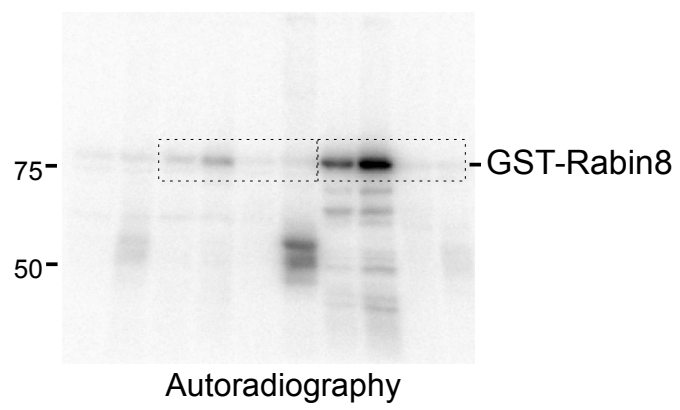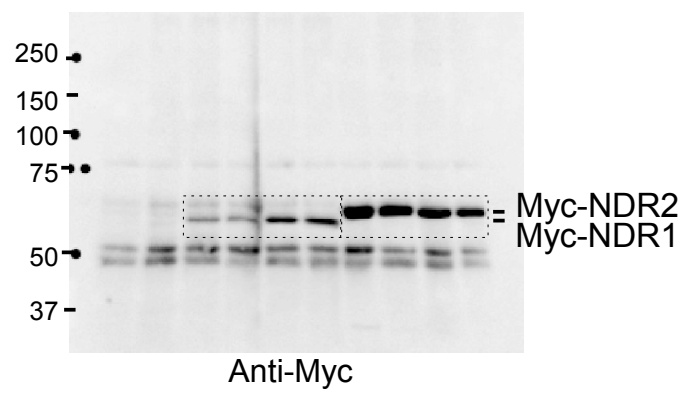

Supplement: emboj201332df1a.pdf [file emboj201332df1a.pdf]

Figure 1B left

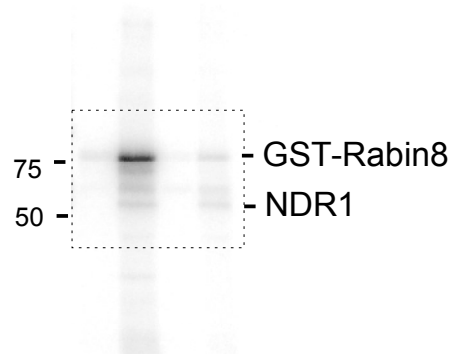

Autoradiography

Figure 1B right

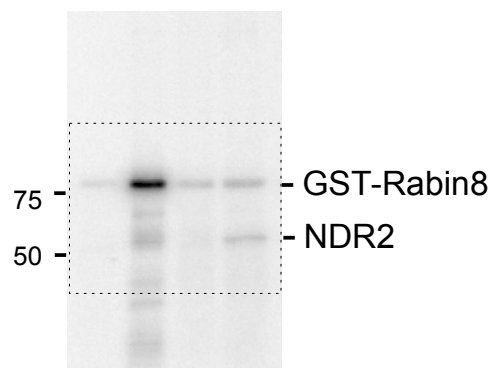

Autoradiography

Supplement: emboj201332df1b.pdf [file emboj201332df1b.pdf]

Figure 2A

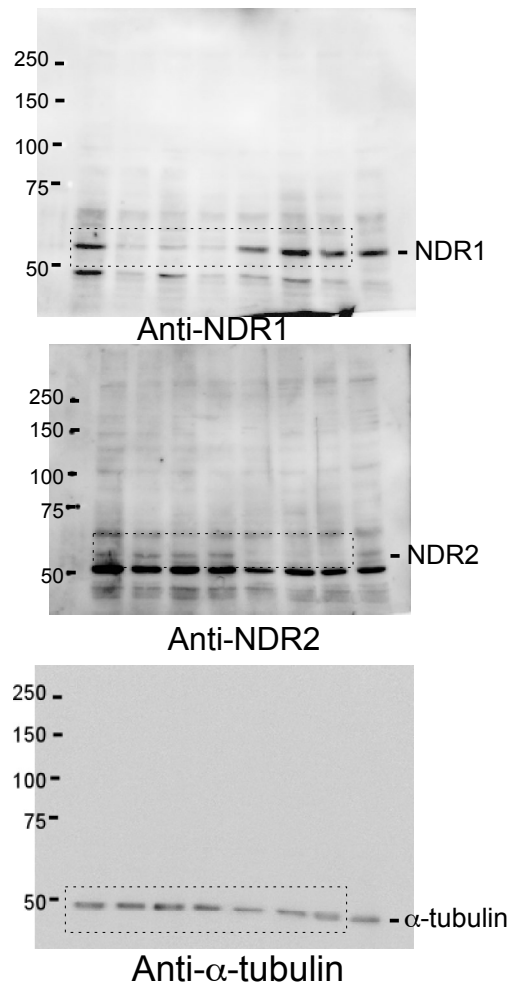

Supplement: emboj201332df2a.pdf [file emboj201332df2a.pdf]

Figure 2I

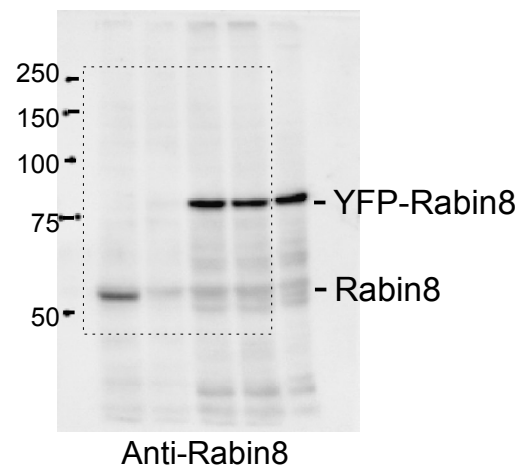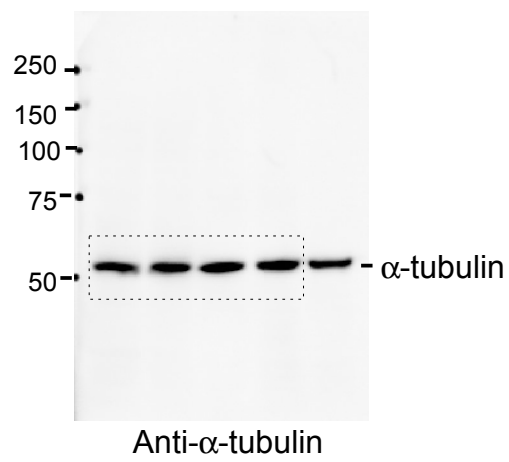

Supplement: emboj201332df2i.pdf [file emboj201332df2i.pdf]

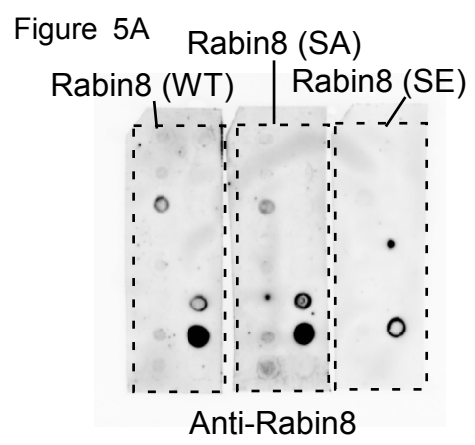

Supplement: emboj201332df5a.pdf [file emboj201332df5a.pdf]

Figure 5B

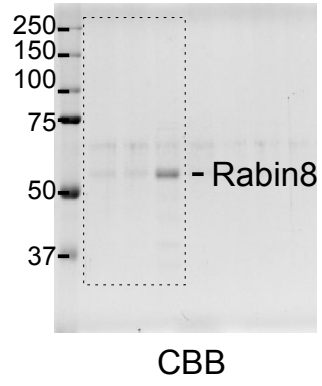

Supplement: emboj201332df5b.pdf [file emboj201332df5b.pdf]

Figure 5C

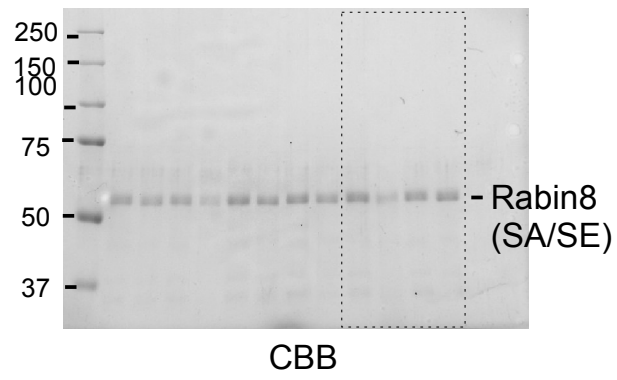

Supplement: emboj201332df5c.pdf [file emboj201332df5c.pdf]

Figure 5D

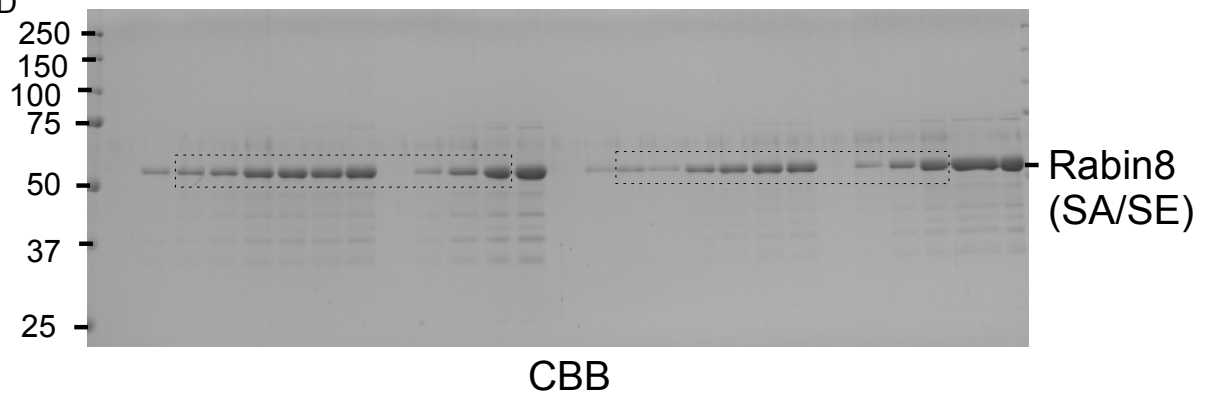

Supplement: emboj201332df5d.pdf [file emboj201332df5d.pdf]

Figure 5G

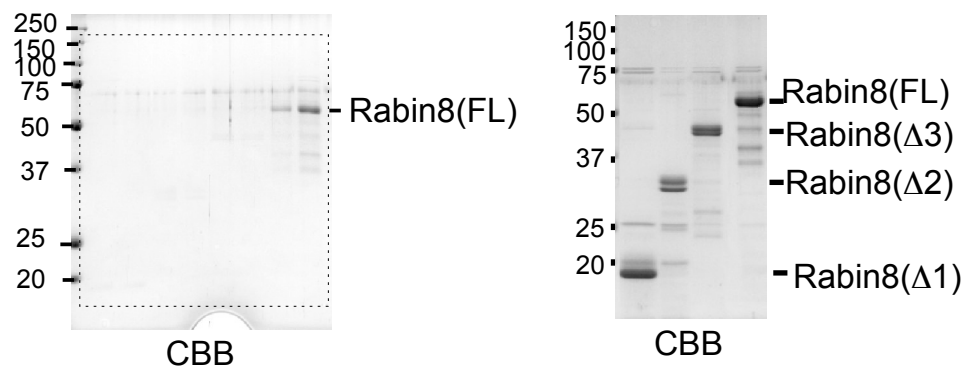

Supplement: emboj201332df5g.pdf [file emboj201332df5g.pdf]

Figure 6B

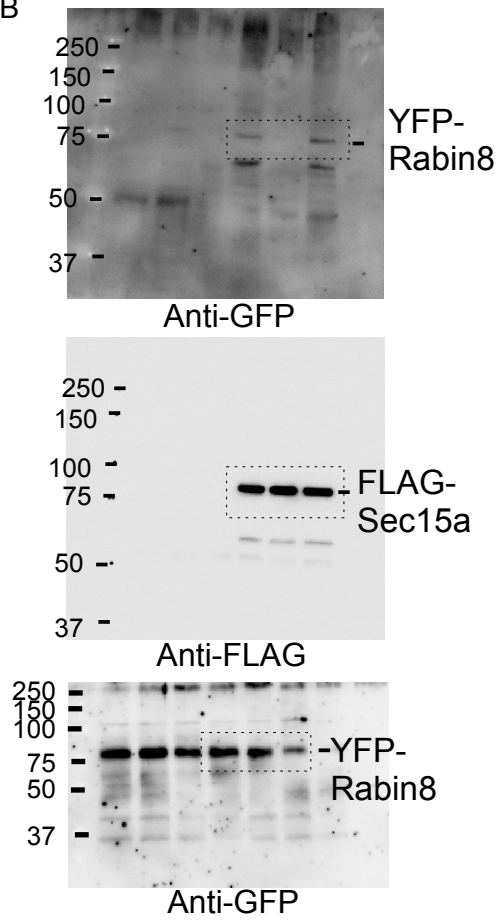

Supplement: emboj201332df6b.pdf [file emboj201332df6b.pdf]

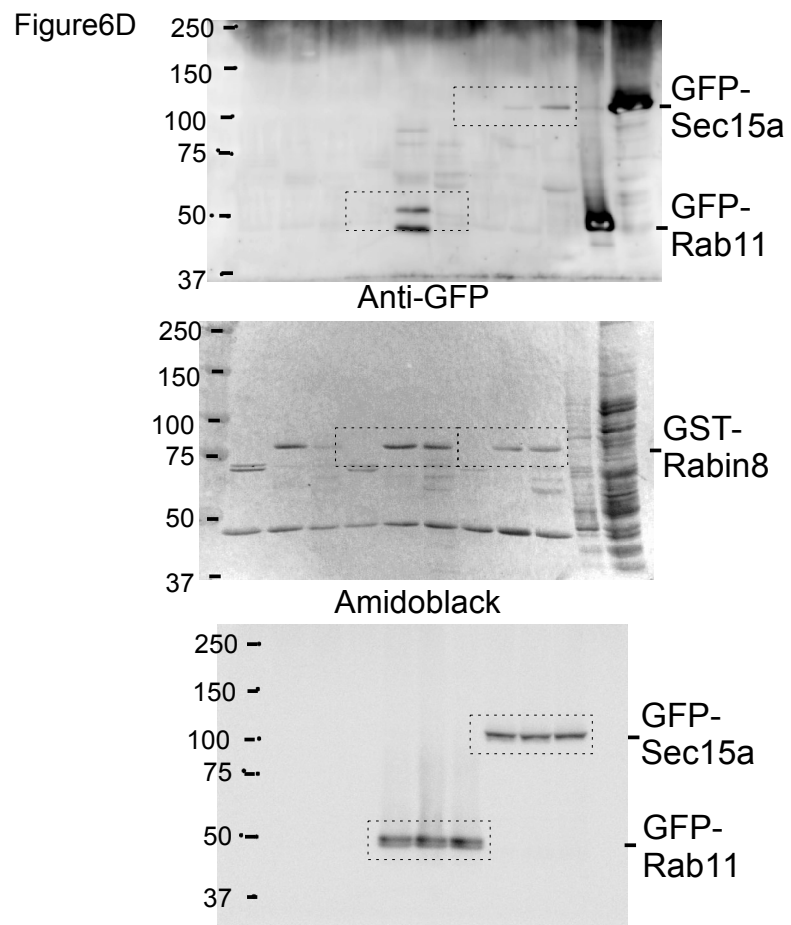

Supplement: emboj201332df6d.pdf [file emboj201332df6d.pdf]

Figure 6E

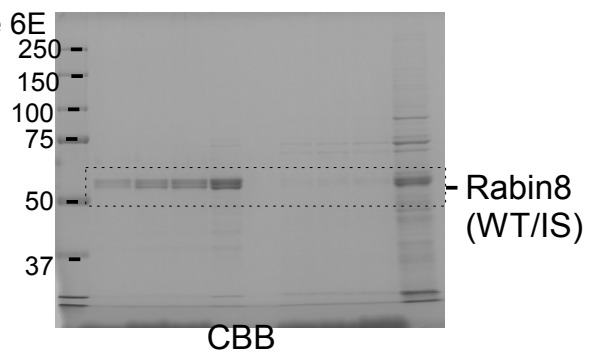

Supplement: emboj201332df6e.pdf [file emboj201332df6e.pdf]

Figure 6F

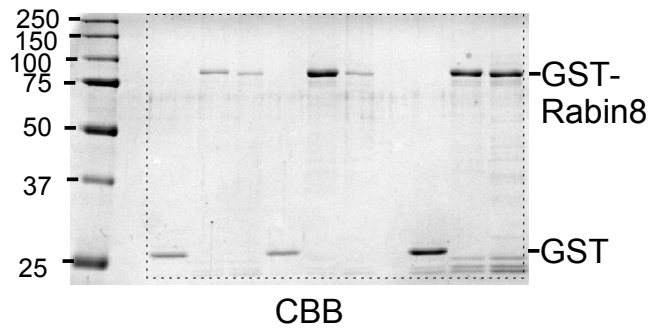

Supplement: emboj201332df6f.pdf [file emboj201332df6f.pdf]

Figure S1A

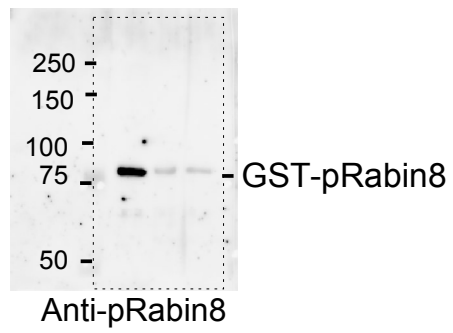

Supplement: emboj201332dfs1a.pdf [file emboj201332dfs1a.pdf]

Figure S1B

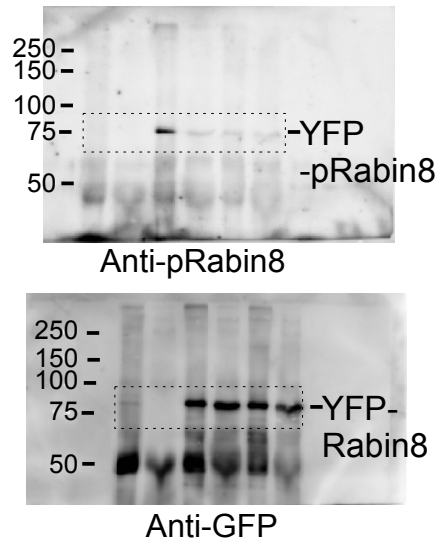

Supplement: emboj201332dfs1b.pdf [file emboj201332dfs1b.pdf]

Figure S1C

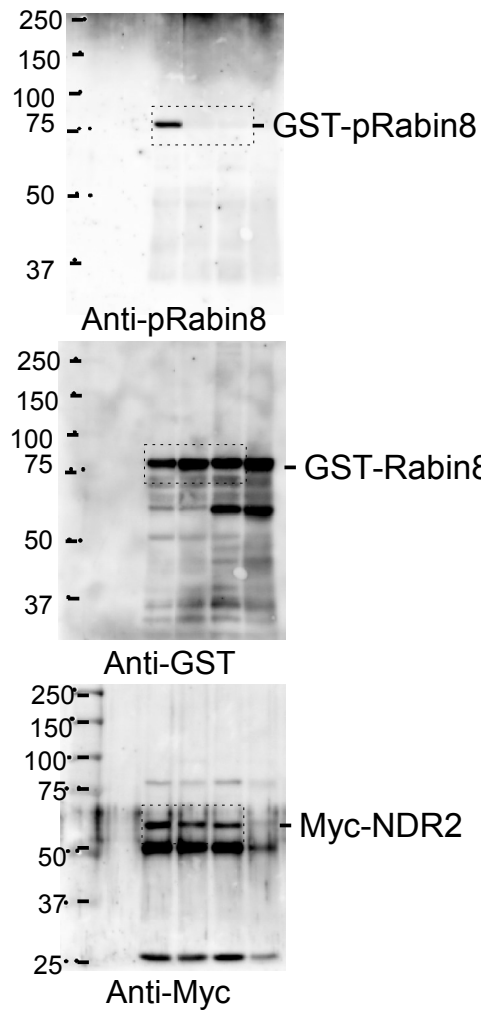

Supplement: emboj201332dfs1c.pdf [file emboj201332dfs1c.pdf]

Figure S1D

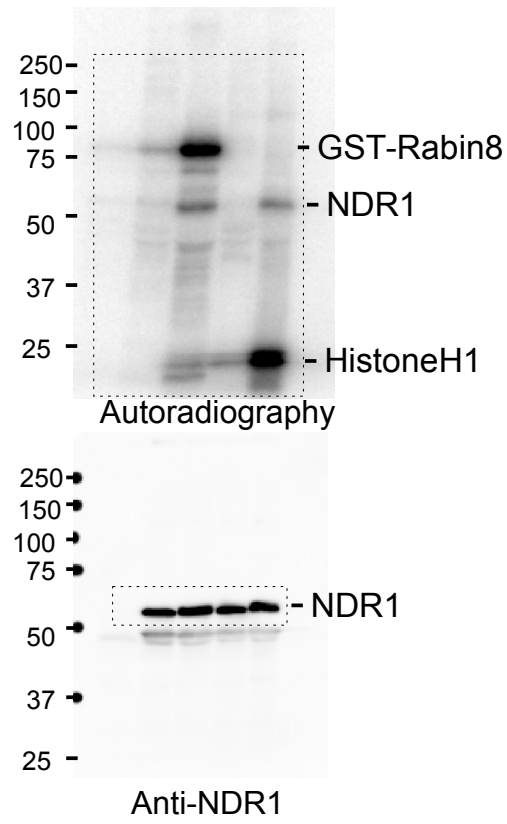

Supplement: emboj201332dfs1d.pdf [file emboj201332dfs1d.pdf]

Figure S4A

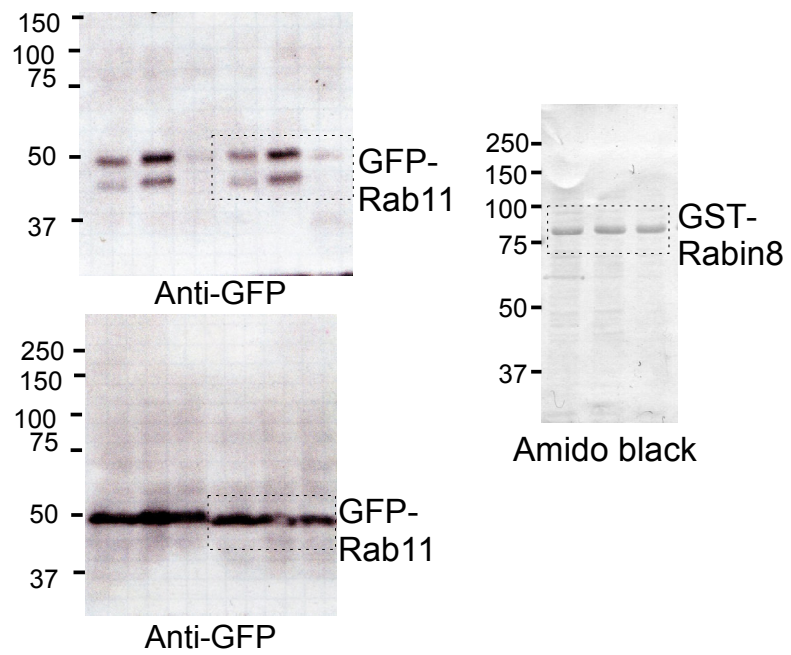

Supplement: emboj201332dfs4a.pdf [file emboj201332dfs4a.pdf]

Figure S4C

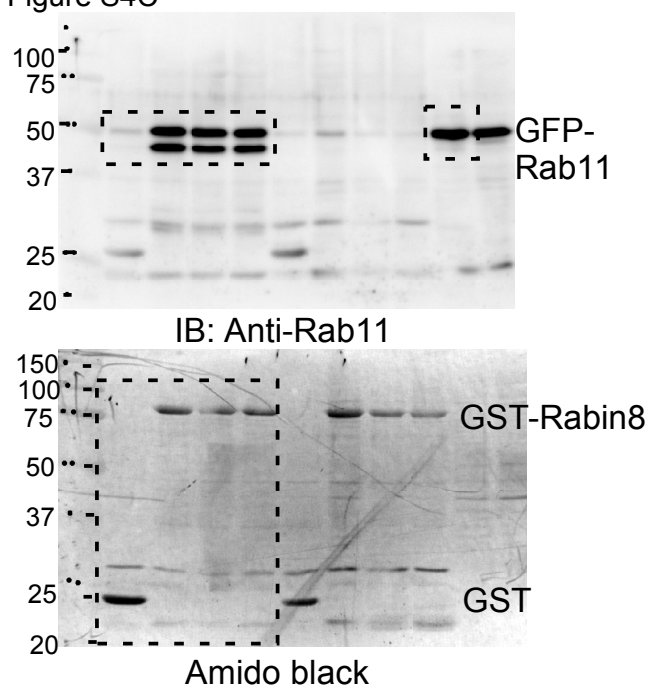

Supplement: emboj201332dfs4c.pdf [file emboj201332dfs4c.pdf]

Figure S4D

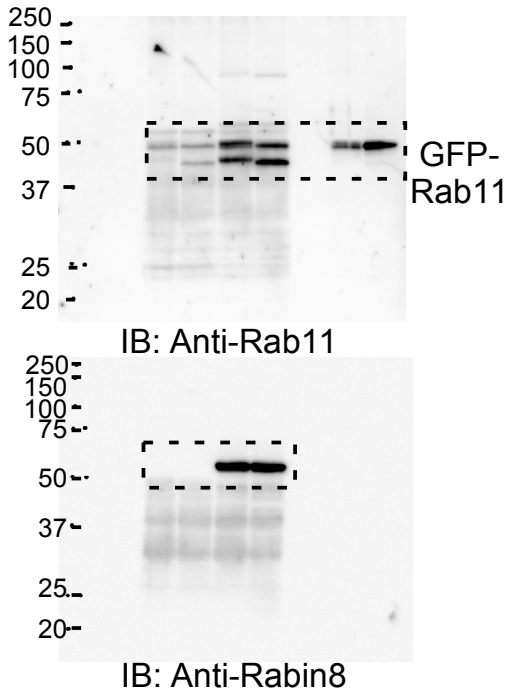

Supplement: emboj201332dfs4d.pdf [file emboj201332dfs4d.pdf]

Figure S5A

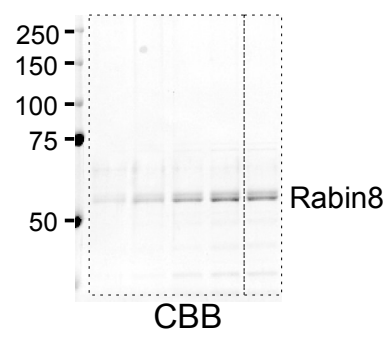

Supplement: emboj201332dfs5a.pdf [file emboj201332dfs5a.pdf]

Figure S5B

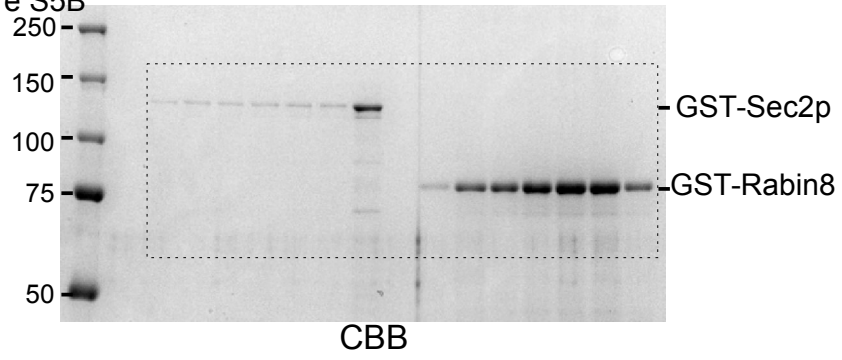

Supplement: emboj201332dfs5b.pdf [file emboj201332dfs5b.pdf]

Figure S5C

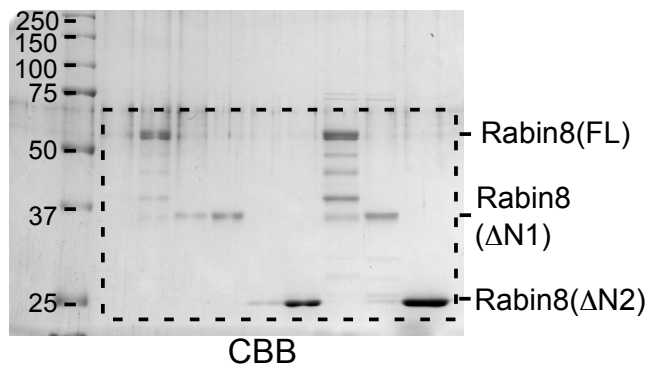

Supplement: emboj201332dfs5c.pdf [file emboj201332dfs5c.pdf]

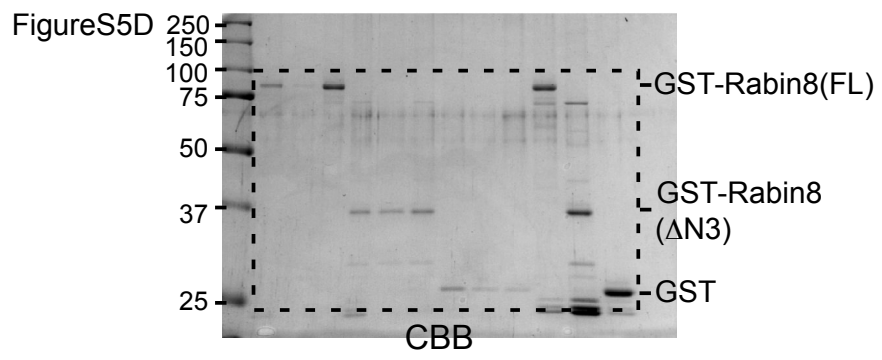

Supplement: emboj201332dfs5d.pdf [file emboj201332dfs5d.pdf]

Figure S7A

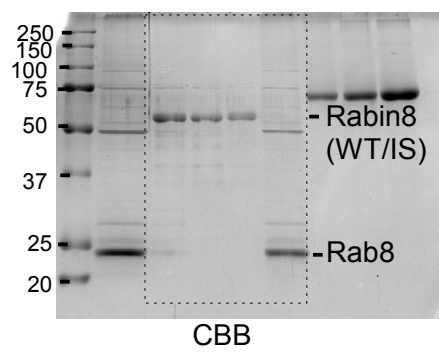

Supplement: emboj201332dfs7a.pdf [file emboj201332dfs7a.pdf]
